# Supplementary material for: CuI nanoparticle-catalyzed synthesis of tetracyclic benzo[e]benzo[4,5]imidazo[1,2-c][1,3]thiazin-6-imine heterocycles by SNAr-type C–S, C–N bond formation from isothiocyanatobenzenes and benzimidazoles
Source: Royal Society of Chemistry journal article supplement (doi:10.1039/c8ra02552e), 2018-01-01

**CuI nanoparticles Catalyzed Synthesis of Tetracyclic Heterocycles**  
**benzo[*e*]benzo[4,5]imidazo[1,2-*c*][1,3]thiazin-6-imine by S<sub>N</sub>Ar-Type C-S, C-N**  
**Bond Formation with isothiocyanatobenzenes and Benzimidazoles**

Xiaolong Guo, Luyao Wang\*, Jing Hu and Mengmeng Zhang

Department of Chemistry, Capital Normal University, Beijing 100048, People's Republic of China

Table of contents

|                                                                   |    |
|-------------------------------------------------------------------|----|
| 1. Crystal data of 3b .....                                       | S2 |
| 2. General Procedures .....                                       | S3 |
| 3. References .....                                               | S5 |
| 4. Copies of <sup>1</sup> H and <sup>13</sup> C NMR Spectra ..... | S6 |

## 1. Crystal data of 3b

**Table S1 Data collection and structure refinement of 3b (CCDC No. 1818722).**

|                                                                    |                                                  |
|--------------------------------------------------------------------|--------------------------------------------------|
| Compound                                                           | 3b                                               |
| Empirical formula                                                  | C <sub>21</sub> H <sub>15</sub> N <sub>3</sub> S |
| Formula weight                                                     | 341.42                                           |
| Crystal system                                                     | monoclinic                                       |
| Space group                                                        | C12/c1                                           |
| T(K)                                                               | 299                                              |
| $\Lambda$ (Å)                                                      | 1.54184                                          |
| A (Å)                                                              | 23.3793(3)                                       |
| B (Å)                                                              | 7.23290(10)                                      |
| C (Å)                                                              | 19.5343(3)                                       |
| $\alpha$ (°)                                                       | 90                                               |
| $\beta$ (°)                                                        | 92.6530(10)                                      |
| $\gamma$ (°)                                                       | 90                                               |
| V(Å <sup>3</sup> )                                                 | 3299.71(8)                                       |
| Z                                                                  | 8                                                |
| D <sub>calc</sub> (mg/m <sup>3</sup> )                             | 1.375                                            |
| F(000)                                                             | 1424                                             |
| Crystal size (mm <sup>3</sup> )                                    | 0.4 x 0.2 x 0.2                                  |
| $\theta$ range for data collection (deg.)                          | 3.785 to 66.565                                  |
| Data/restraints/parameters                                         | 2882 / 0 / 226                                   |
| Goodness-of-fit on F <sup>2</sup>                                  | 1.094                                            |
| Final R <sub>1</sub> /wR <sub>2</sub> indices [ $I > 2\sigma(I)$ ] | 0.0471 / 0.1295                                  |
| R indices (all data)                                               | 0.0500                                           |
| Largest diff. peak and hole(Å <sup>-3</sup> )                      | 0.199 and -0.491                                 |

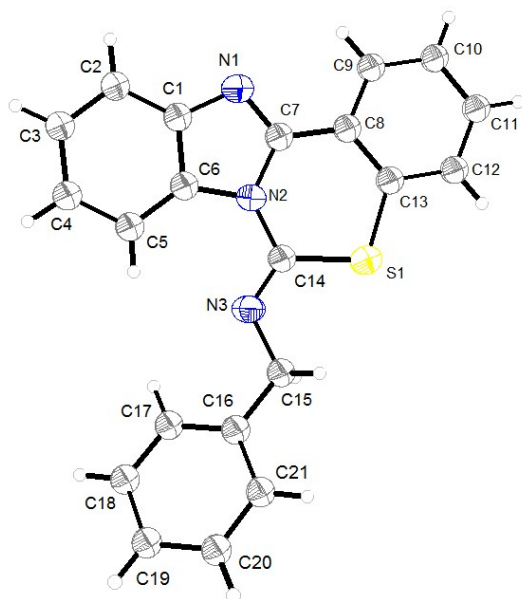

**Figure S1. ORTEP plot of 3b showing thermal ellipsoids at the 50% probability level**

## 2. General Procedures

### General Procedure for the Preparation of Substituted 2-(2-Halophenyl)-1H-benzo[d]imidazoles (1)<sup>1</sup>

To a flask were added substituted 1,2-diaminobenzene (1.08 g, 10 mmol), 2-halobenzoic acid (10 mmol) and PPA (20 g), and the reaction mixture was heated at 170 °C in an oil bath for 7 h. After the reaction was complete, the reaction mixture was slowly poured into ice water, and the resulting mixture was basified with solid NaOH and NaHCO<sub>3</sub>. Once the solution had reached pH 8-10, the precipitate was isolated by filtration, washed with cold water and recrystallized from hot aqueous ethanol. The solid was then dried to afford the corresponding 2-(2-halophenyl)-1H-benzo[d]imidazole.

#### 2-(2-iodophenyl)-1H-benzo[d]imidazole

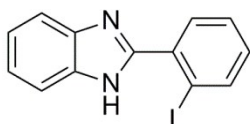

<sup>1</sup>H NMR (600 MHz, dmso)  $\delta$  12.70 (s, 1H), 8.06 (dd,  $J$  = 8.0, 1.0 Hz, 1H), 7.70 (d,  $J$  = 7.8 Hz, 1H), 7.64 – 7.60 (m, 1H), 7.55 (ddd,  $J$  = 10.8, 8.5, 4.5 Hz, 2H), 7.30 – 7.19 (m, 3H).

<sup>13</sup>C NMR (151 MHz, dmso)  $\delta$  152.54, 143.15, 139.61, 136.55, 134.32, 131.31, 131.16, 128.09, 122.51, 121.48, 119.10, 111.44, 97.34.

#### 2-(2-iodophenyl)-1H-benzo[d]imidazole

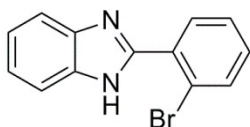

<sup>1</sup>H NMR (600 MHz, dmso)  $\delta$  12.73 (s, 1H), 7.82 (dd,  $J$  = 8.1, 1.1 Hz, 1H), 7.77 (dd,  $J$  = 7.6, 1.7 Hz, 1H), 7.70 (d,  $J$  = 7.8 Hz, 1H), 7.59 – 7.52 (m, 2H), 7.49 – 7.44 (m, 1H), 7.24 (dt,  $J$  = 15.1, 6.7 Hz, 2H).

<sup>13</sup>C NMR (151 MHz, dmso)  $\delta$  150.38, 143.20, 134.45, 133.36, 132.38, 132.22, 131.32, 127.75, 122.62, 121.56, 121.51, 119.08, 111.54.

#### 2-(2-iodophenyl)-6-methyl-1H-benzo[d]imidazole

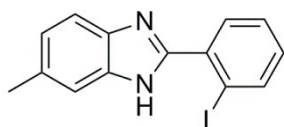

<sup>1</sup>H NMR (600 MHz, dmso)  $\delta$  12.55 (s, 1H), 8.05 (d,  $J$  = 7.9 Hz, 1H), 7.60 (d,  $J$  = 7.4 Hz, 1H), 7.54 (t,  $J$  = 7.4 Hz, 1H), 7.49 (s, 1H), 7.38 (s, 1H), 7.26 (t,  $J$  = 7.6 Hz, 1H), 7.05 (d,  $J$  = 8.0 Hz, 1H), 2.44 (s, 3H).

<sup>13</sup>C NMR (151 MHz, dmso)  $\delta$  166.18, 161.19, 160.49, 139.67, 136.66, 134.78, 131.31, 131.14, 130.01, 128.74, 128.14, 97.36, 21.33.

#### 2-(2-bromophenyl)-6-methyl-1H-benzo[d]imidazole

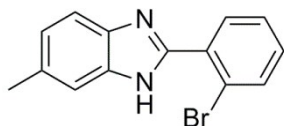

$^1\text{H}$  NMR (600 MHz, dmso)  $\delta$  12.58 (s, 1H), 7.81 (dd,  $J$  = 8.0, 0.7 Hz, 1H), 7.75 (dd,  $J$  = 7.6, 1.6 Hz, 1H), 7.54 (td,  $J$  = 7.5, 0.9 Hz, 1H), 7.50 (d,  $J$  = 2.1 Hz, 1H), 7.45 (td,  $J$  = 7.8, 1.7 Hz, 1H), 7.39 (s, 1H), 7.06 (d,  $J$  = 8.1 Hz, 1H), 2.44 (s, 3H).

$^{13}\text{C}$  NMR (151 MHz, dmso)  $\delta$  150.00, 133.35, 132.46, 132.17, 131.19, 127.72, 123.52, 121.47, 21.29.

#### 2-(2-bromophenyl)-3H-imidazo[4,5-b]pyridine

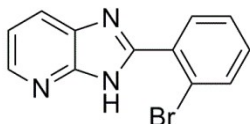

$^1\text{H}$  NMR (600 MHz, dmso)  $\delta$  13.27 (s, 1H), 8.40 (d,  $J$  = 4.1 Hz, 1H), 8.06 (d,  $J$  = 7.5 Hz, 1H), 7.84 (d,  $J$  = 7.9 Hz, 1H), 7.76 (dd,  $J$  = 7.5, 1.0 Hz, 1H), 7.58 (dd,  $J$  = 10.9, 4.1 Hz, 1H), 7.50 (td,  $J$  = 7.8, 1.6 Hz, 1H), 7.29 (dd,  $J$  = 8.0, 4.7 Hz, 1H).

$^{13}\text{C}$  NMR (151 MHz, dmso)  $\delta$  152.17, 143.99, 133.38, 132.20, 131.99, 131.73, 127.79, 121.63, 118.13.

#### 6-bromo-2-(2-iodophenyl)-1H-benzo[d]imidazole

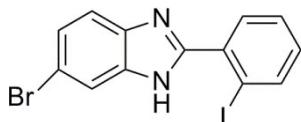

$^1\text{H}$  NMR (600 MHz, dmso)  $\delta$  12.94 (s, 1H), 8.06 (d,  $J$  = 7.3 Hz, 1H), 7.89 (s, 0.5H), 7.71 (s, 0.5H), 7.68 – 7.63 (m, 0.5H), 7.62 (dd,  $J$  = 7.6, 1.6 Hz, 1H), 7.56 (td,  $J$  = 7.5, 0.8 Hz, 1H), 7.51 (d,  $J$  = 7.7 Hz, 0.5H), 7.37 (dd,  $J$  = 24.4, 16.2 Hz, 1H), 7.29 (td,  $J$  = 7.7, 1.6 Hz, 1H).

$^{13}\text{C}$  NMR (151 MHz, dmso)  $\delta$  139.65, 136.02, 131.42, 131.32, 128.15, 125.27, 124.55, 121.50, 120.86, 114.11, 113.32, 97.24.

#### Preparation of CuI NPs

The nanocatalyst was produced by ultrasonic irradiation using copper sulfate ( $\text{CuSO}_4$ ) as the Cu source. First,  $\text{CuSO}_4$  (1 mmol) was cleaned for 20 s in acetone under ultrasonic irradiation followed. The dried substrate was then slowly dipped into a solution of potassium iodide (1 mmol) in 40 mL of distilled water, and the mixture was sonicated for 30 min. When the reaction was complete, the obtained gray precipitate was isolated by filtration, washed with distilled water and dried to afford pure CuI NPs.

According to the diffraction data card (JCPDS, 75-0832); all the peaks can be perfectly indexed to the peak positions characteristic of CuI (**Fig. S2**).

Scanning electron microscopy (SEM) was used to confirm the size of the CuI nanoparticles, and the SEM micrograph is shown in **Fig. S3**. This figure illustrates that, the CuI NPs obtained under ultrasonic irradiation had diameters on the order of nanometers.

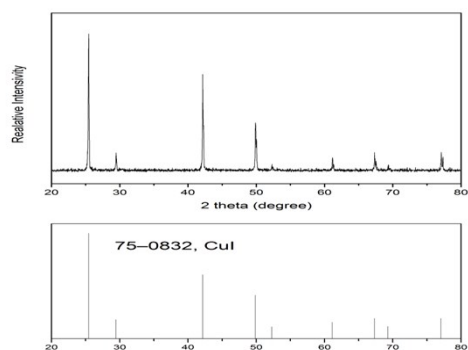

**Fig S2. XRD spectra of CuI NPs**

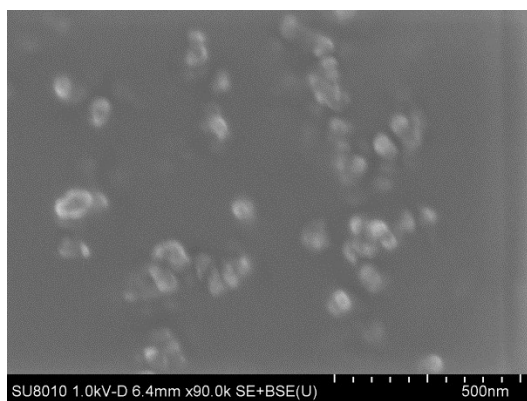

**Fig S3. SEM image of CuI NPs**

### 3. References

- (1) Xu, S.; Lu, J.; Fu, H. Chem. Commun. 2011, 47, 5596.
- (2) Javad, S-G.; Zeinab A.; Abolfazl Z. RSC Adv. 2014, 4, 16385.

### 4. Copies of $^1\text{H}$ and $^{13}\text{C}$ NMR Spectra

和异硫脲酶

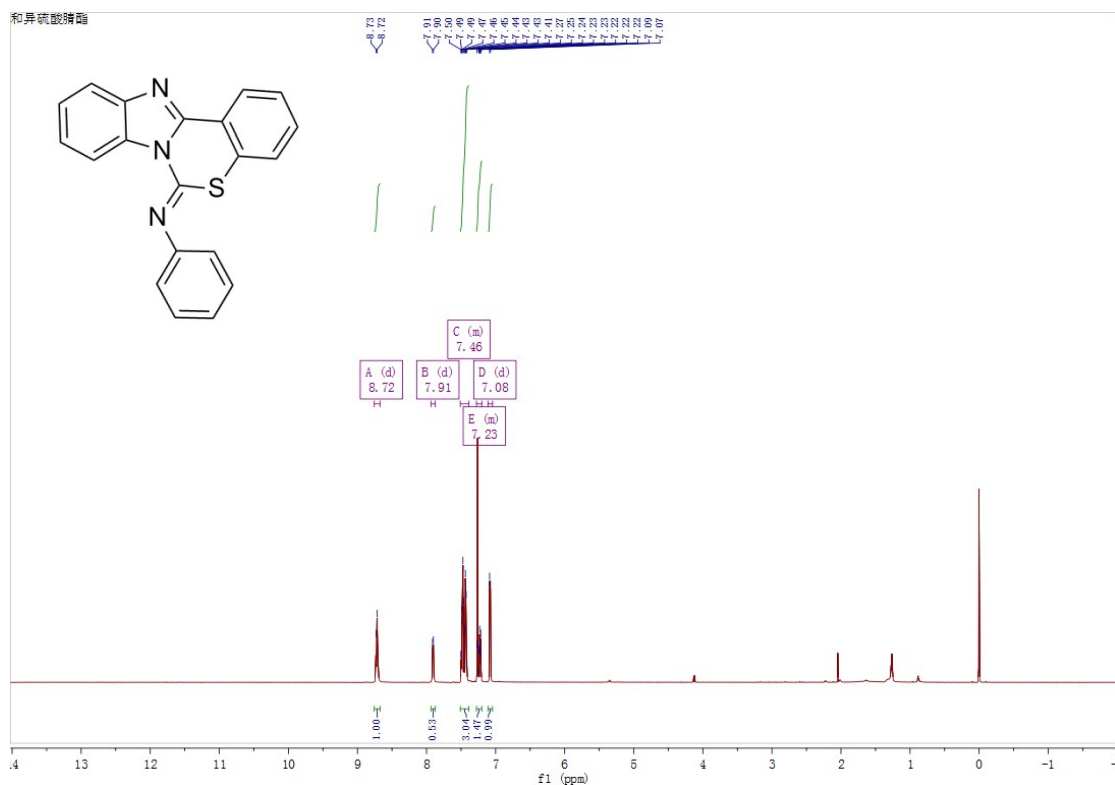

GXL-02-C  
CNU NQMS 600MHZ

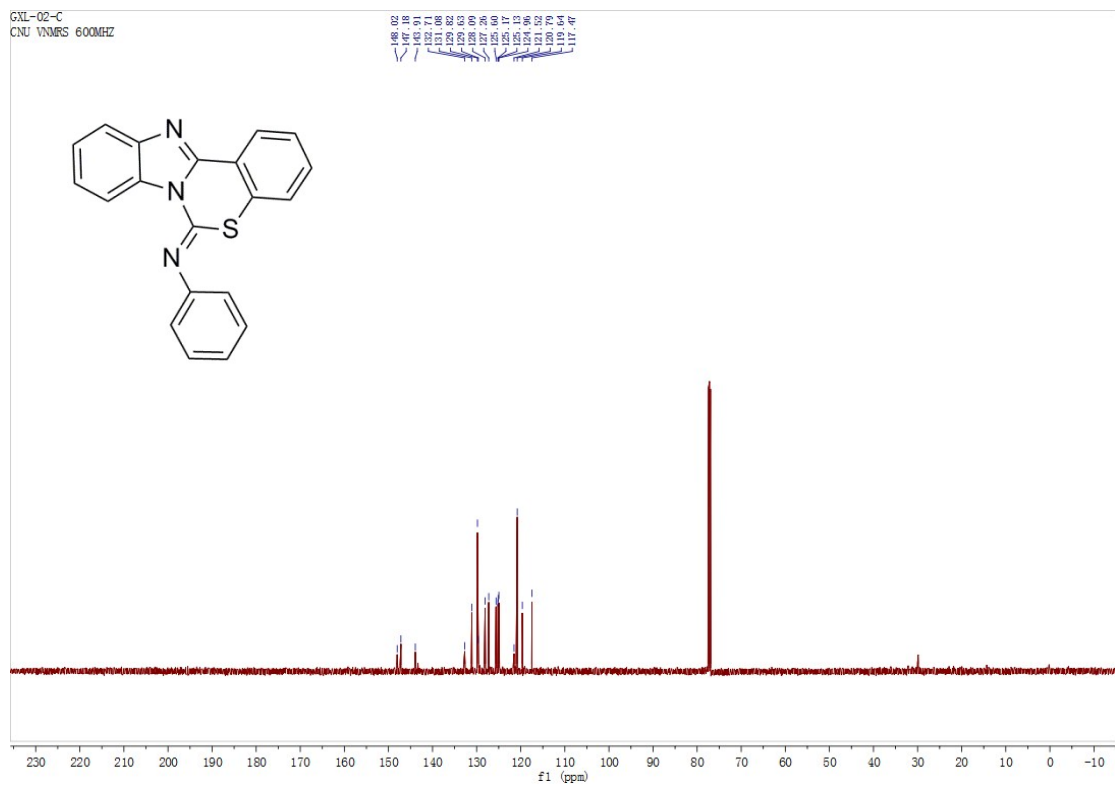

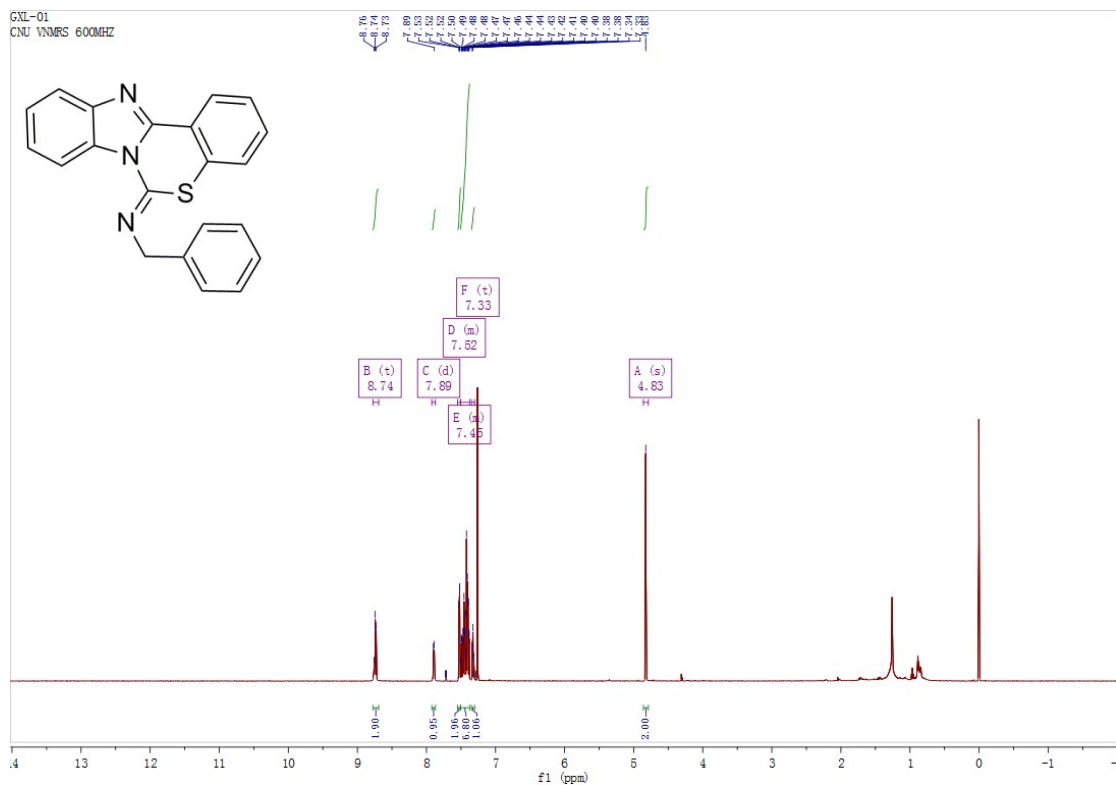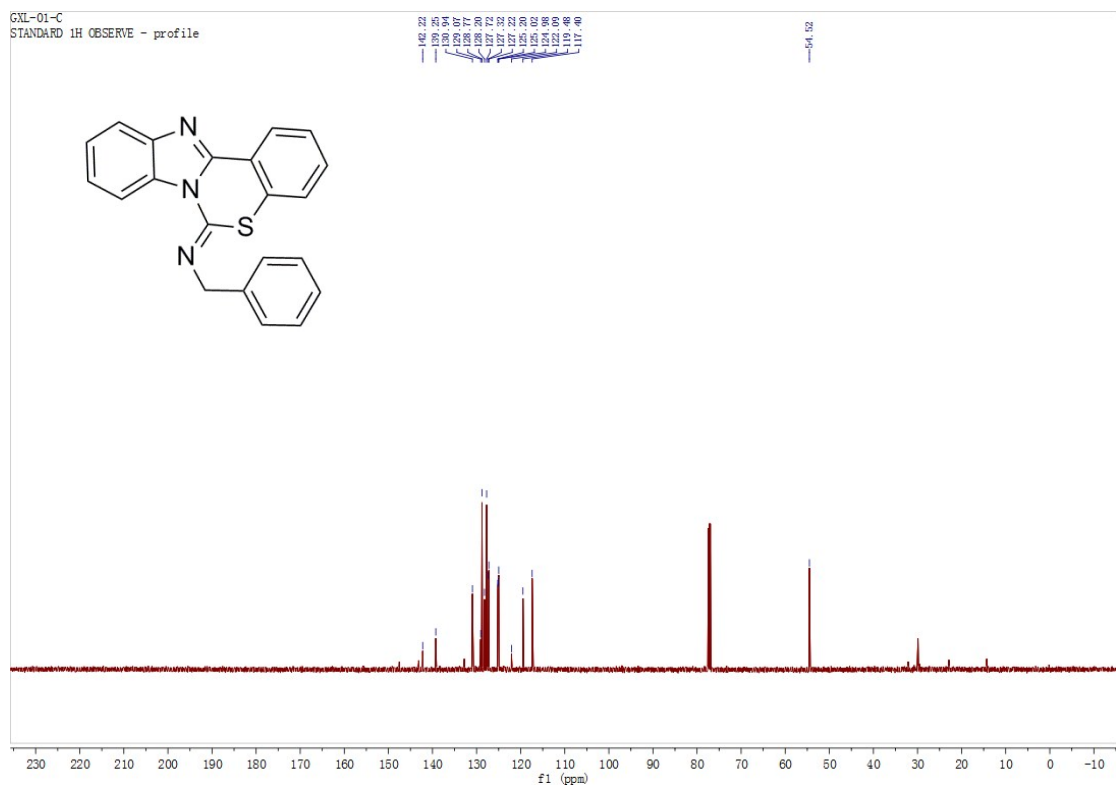





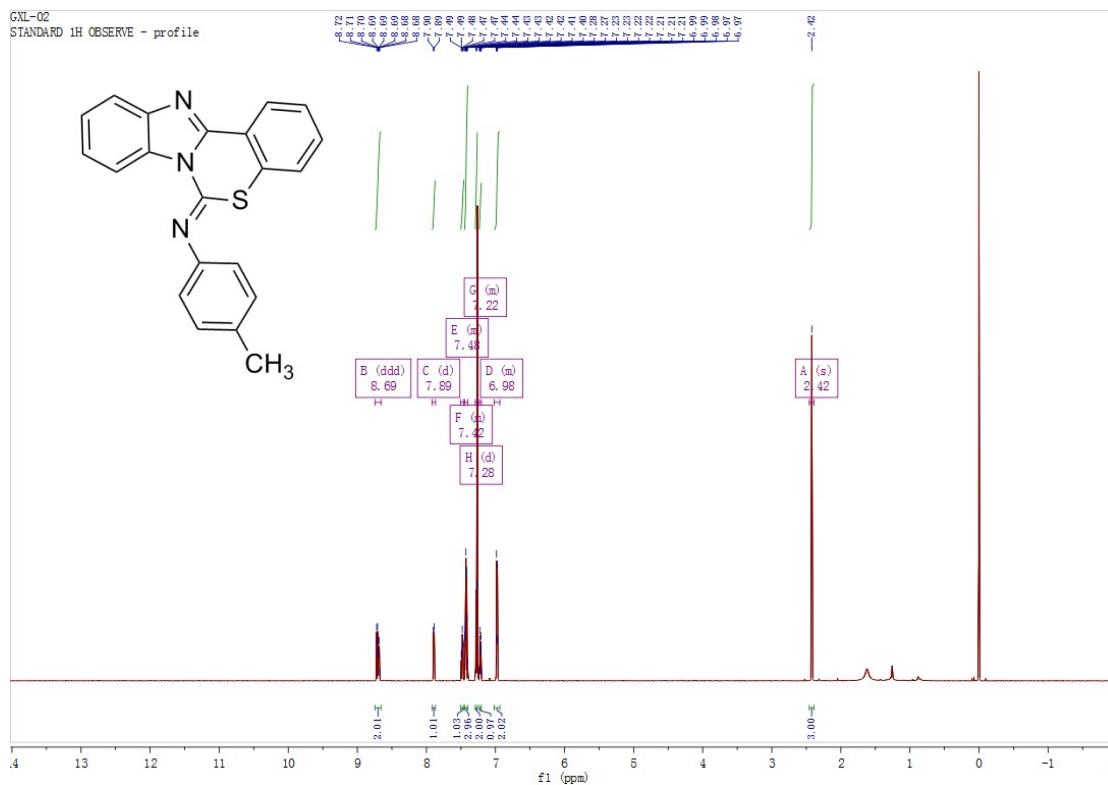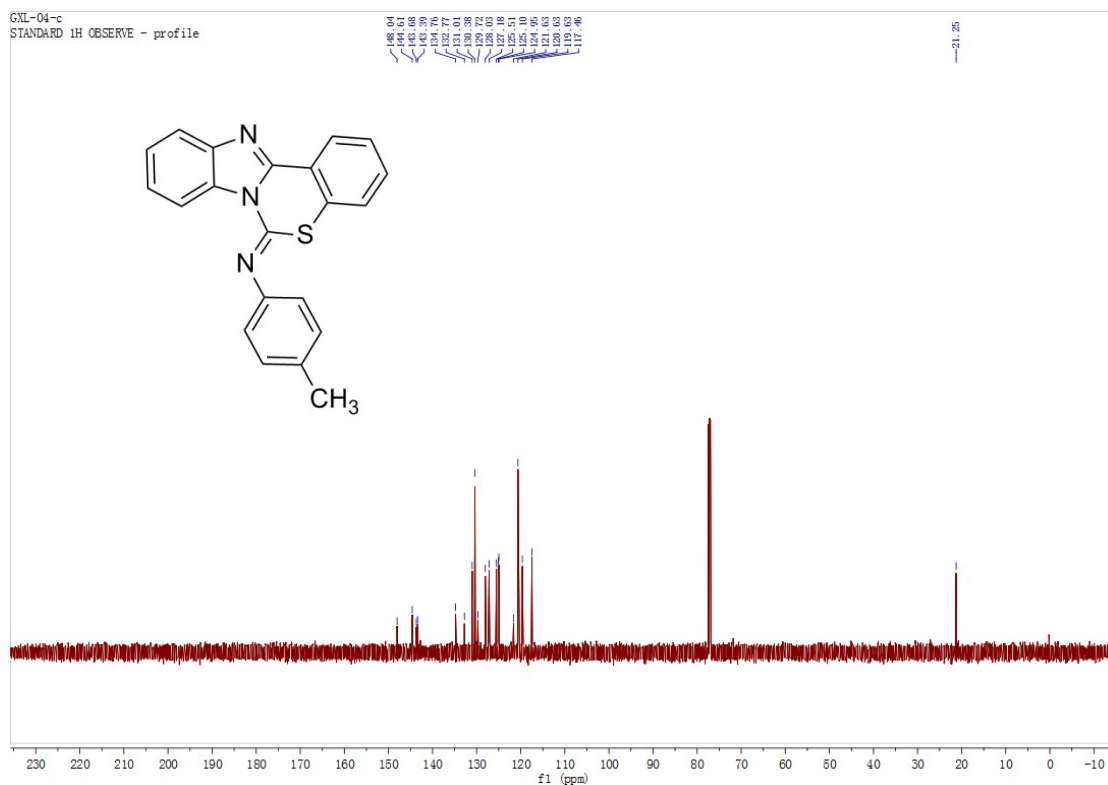





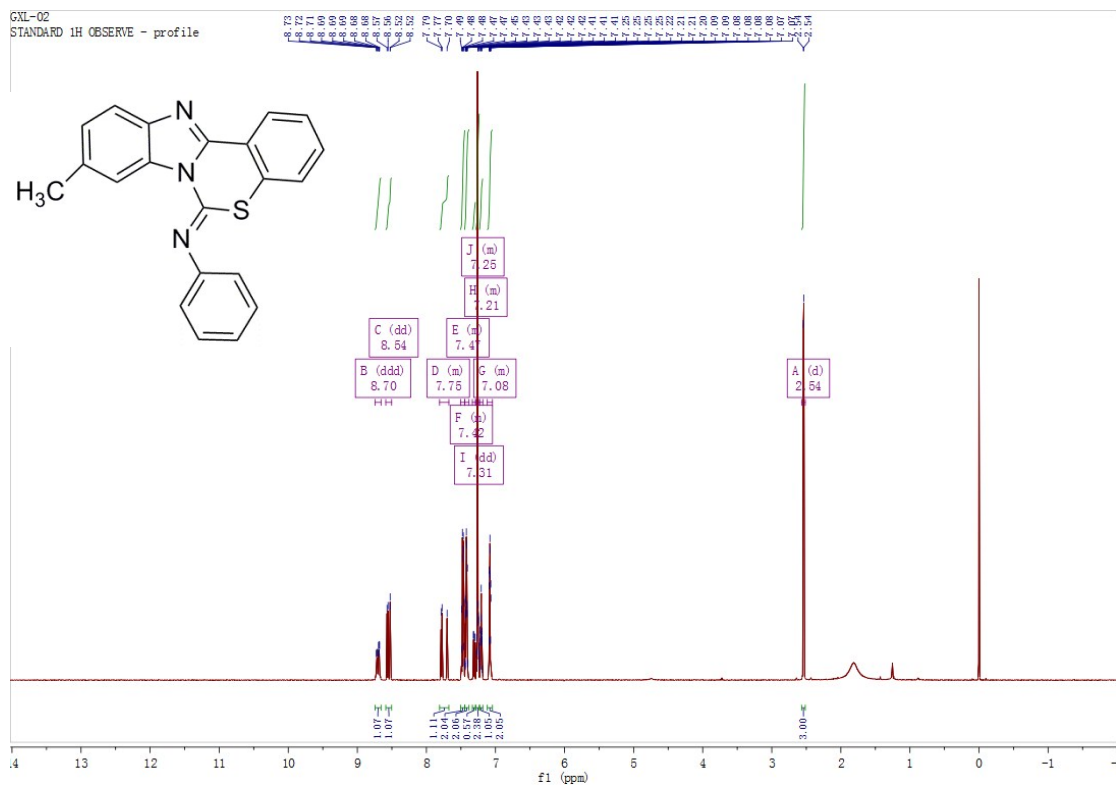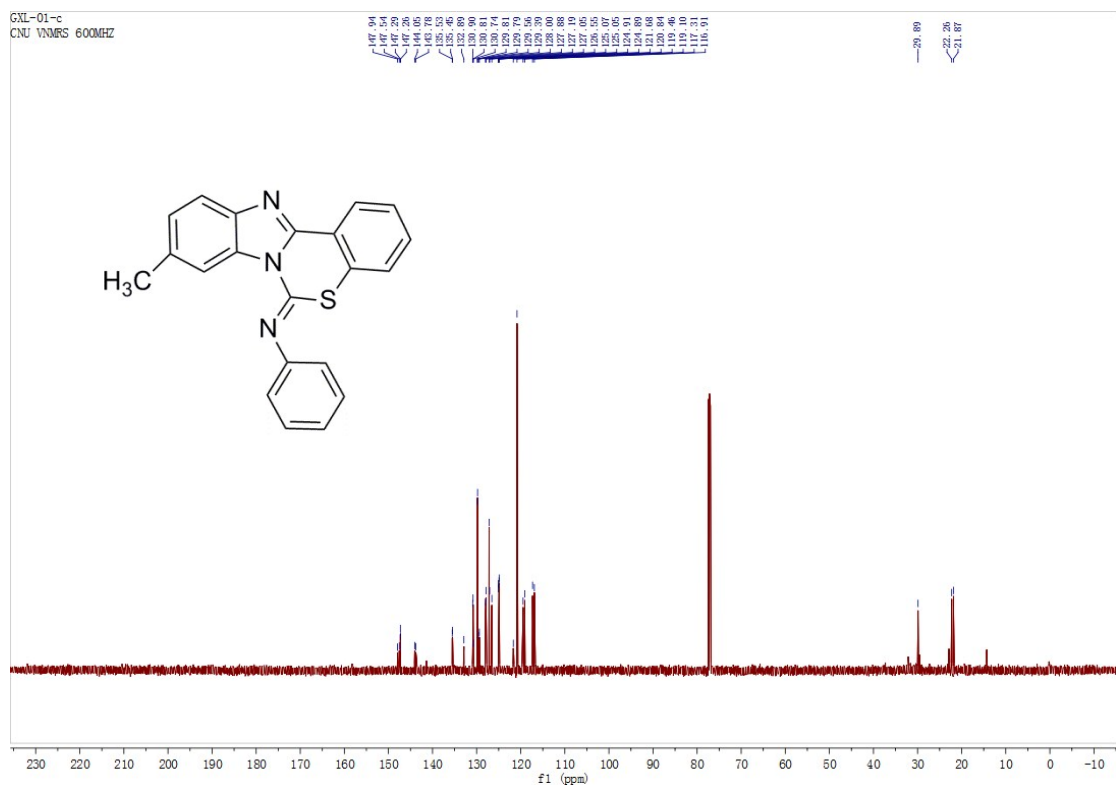







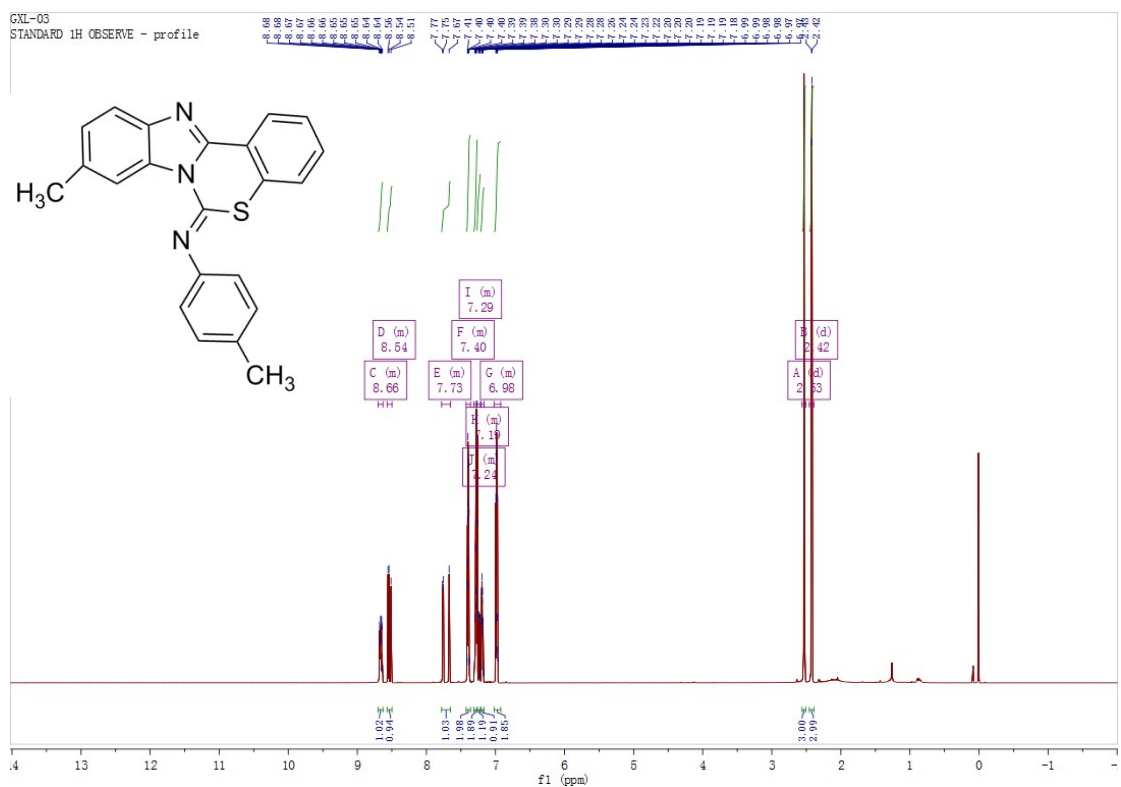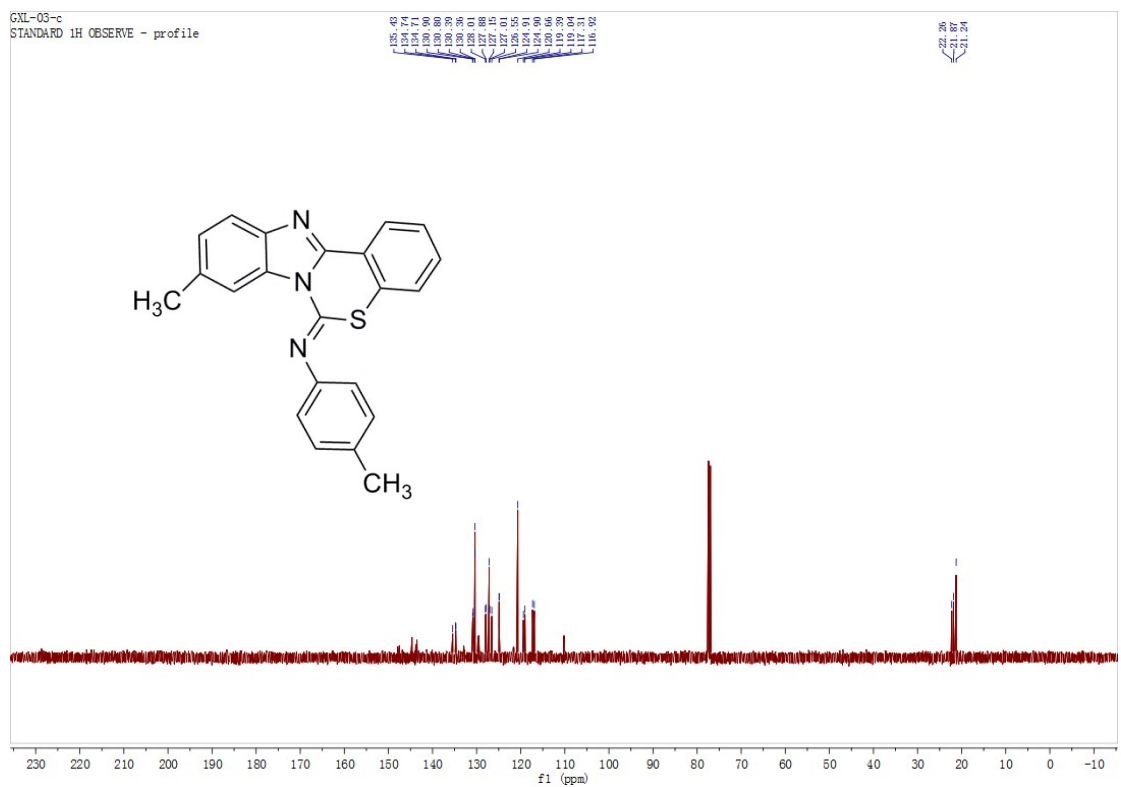





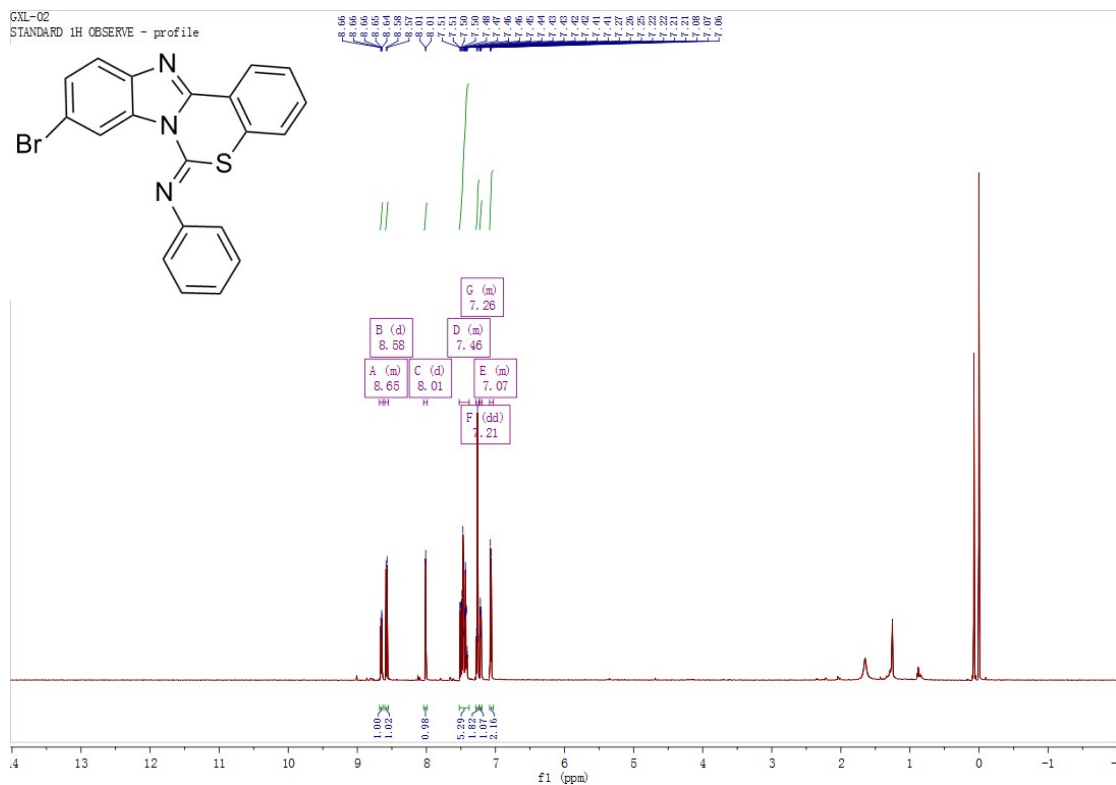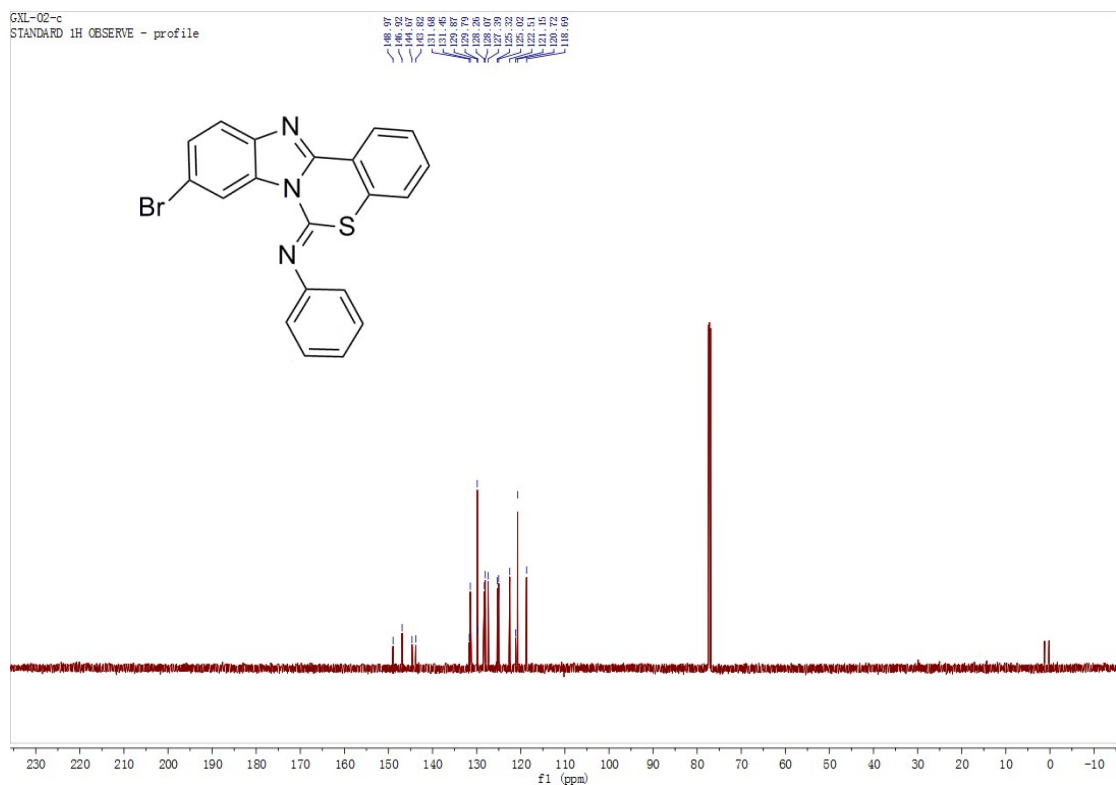

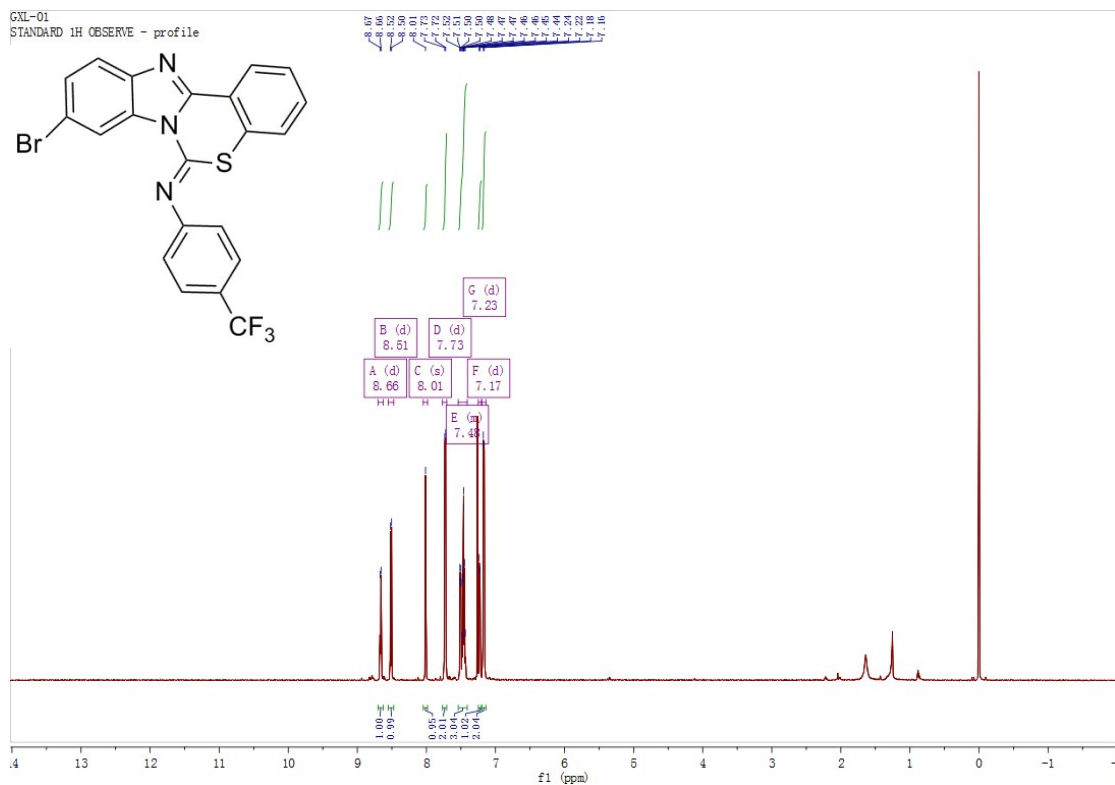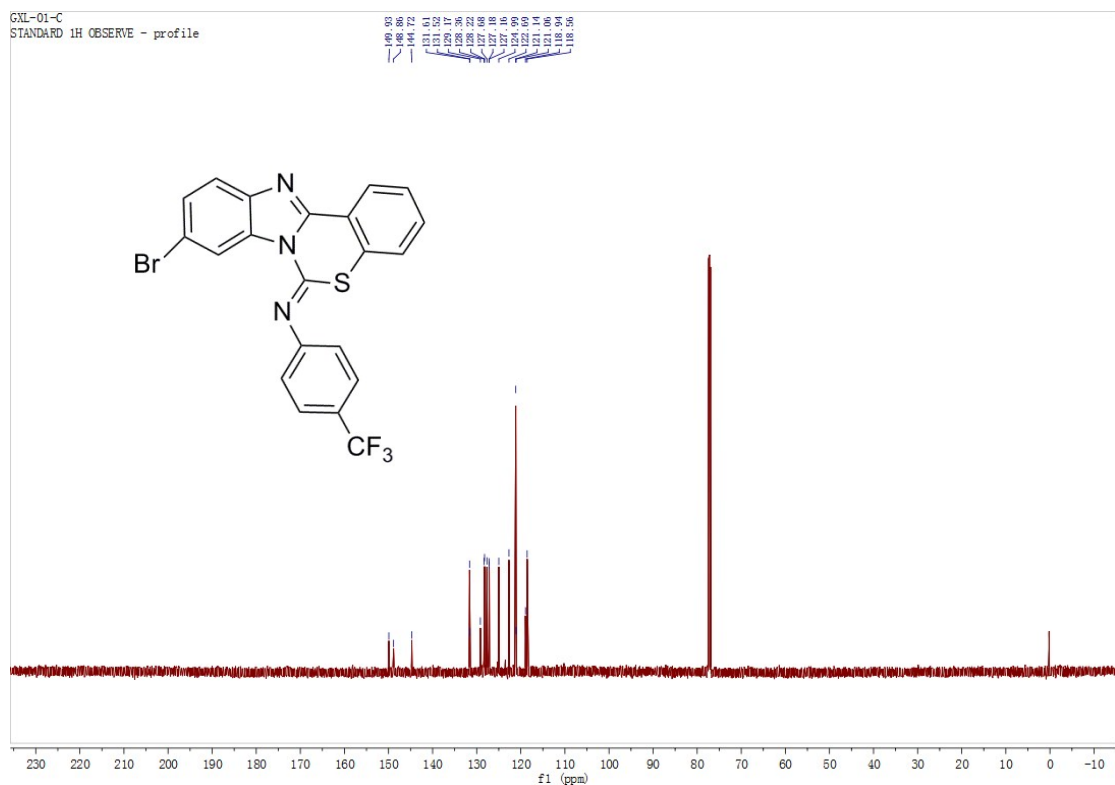

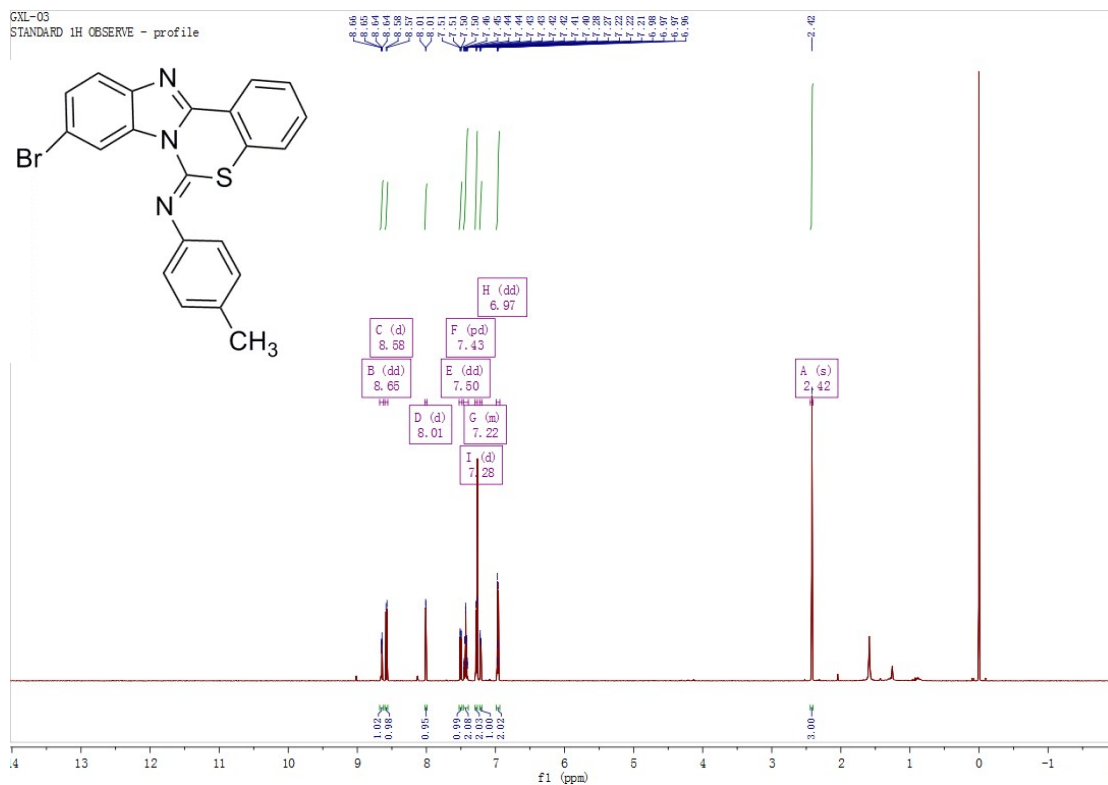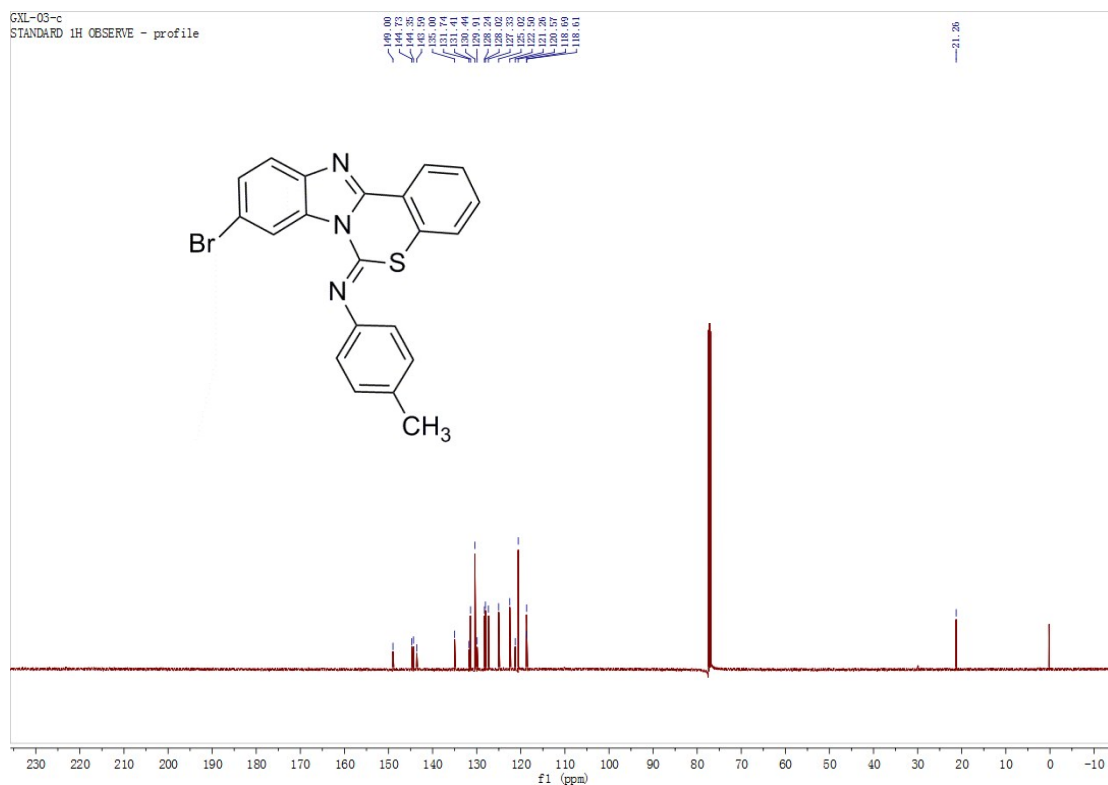

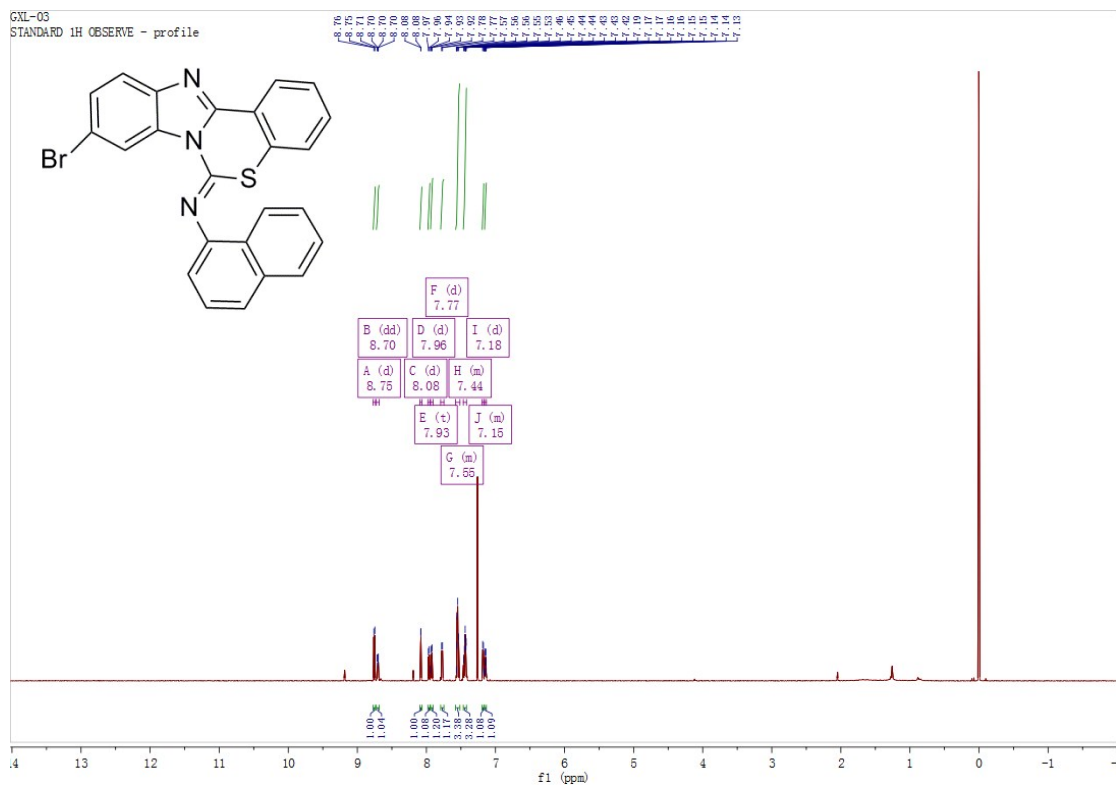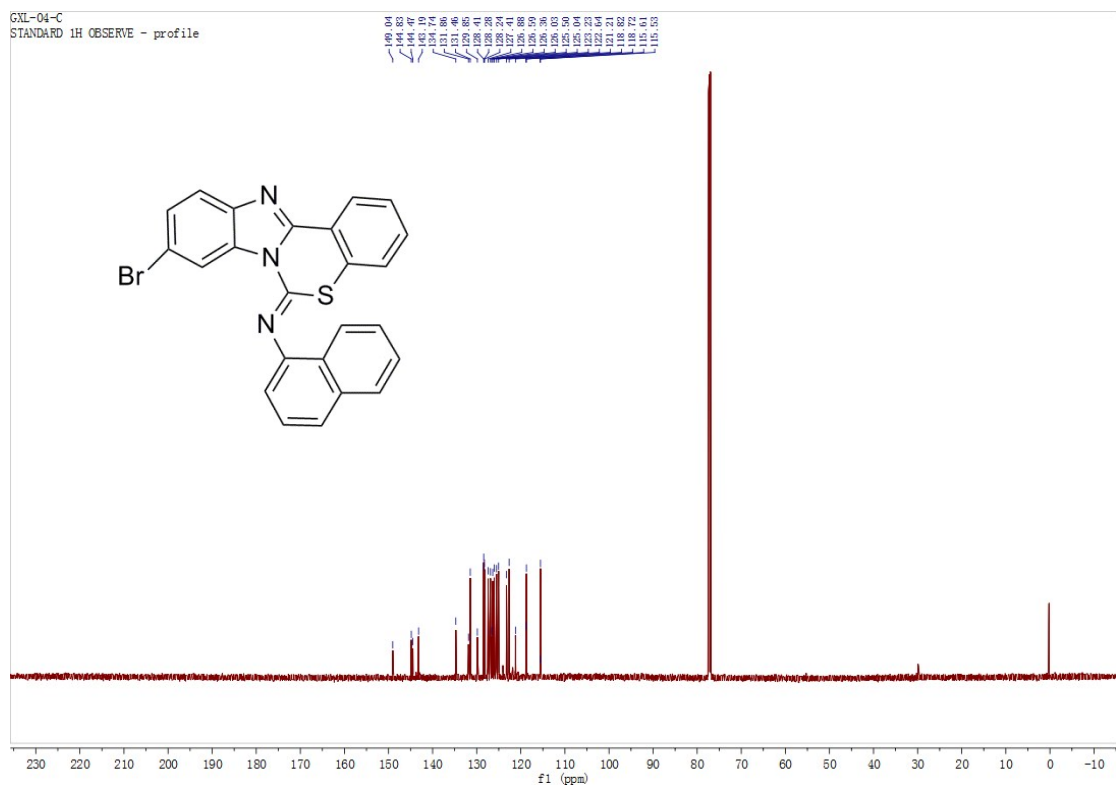



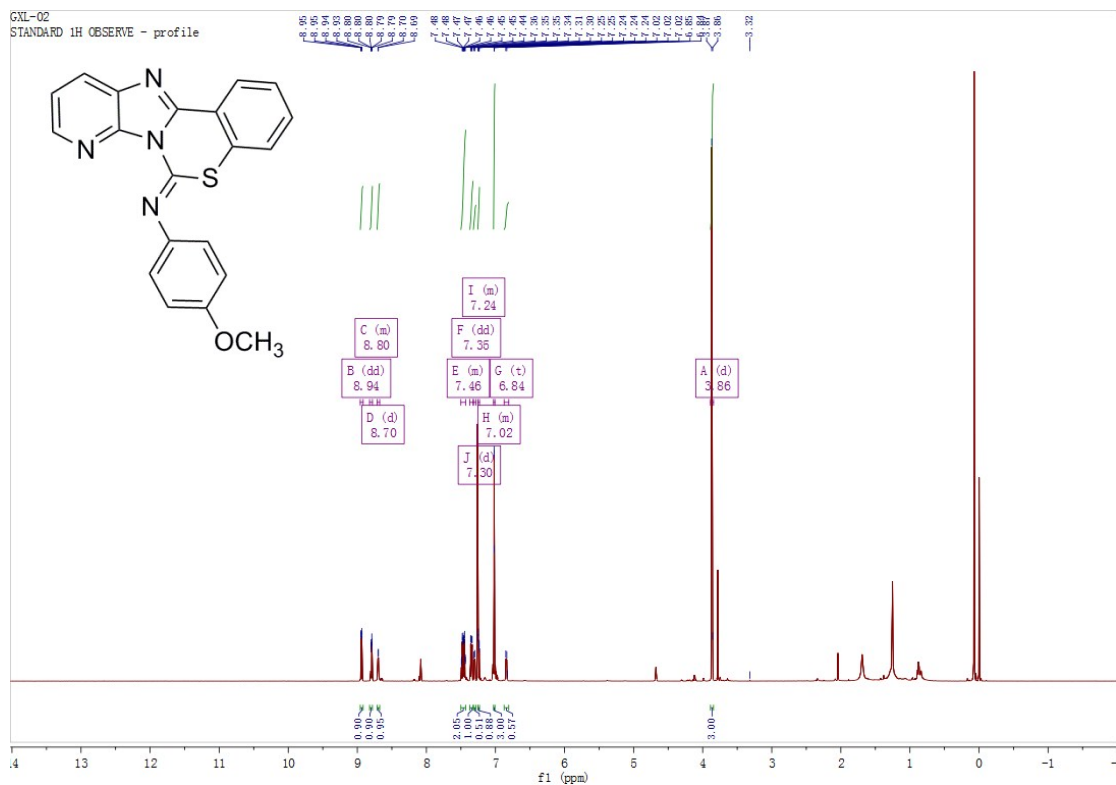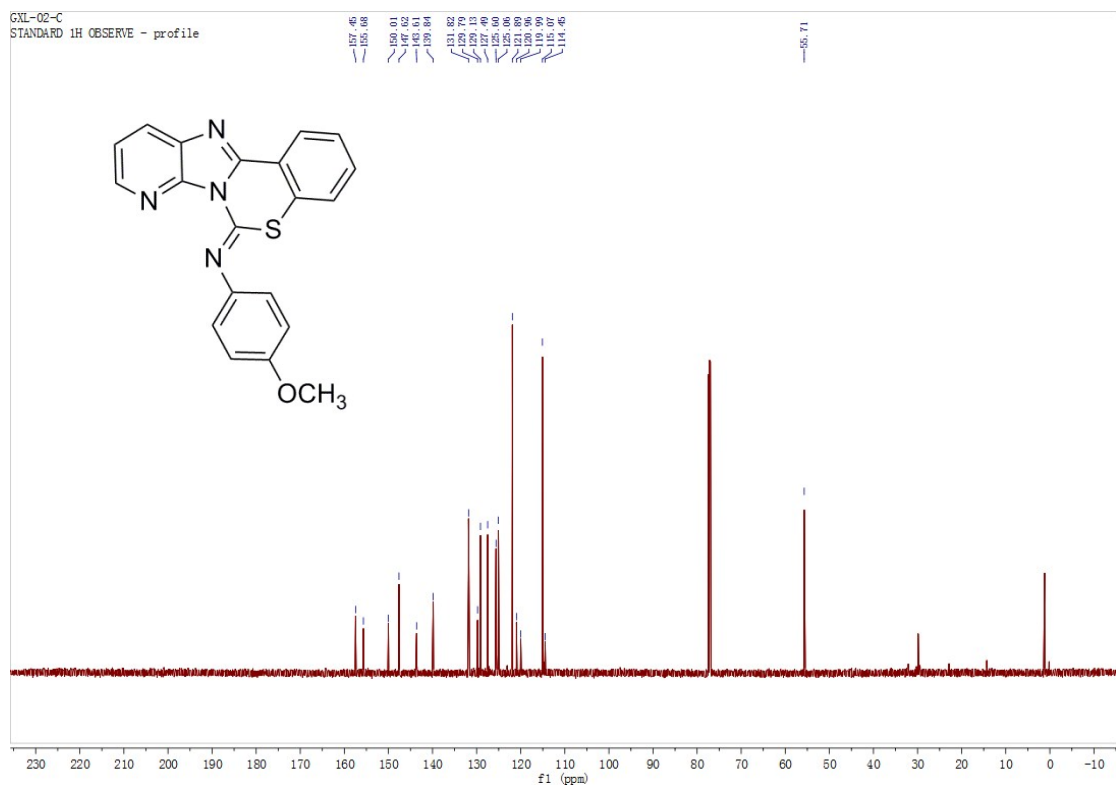

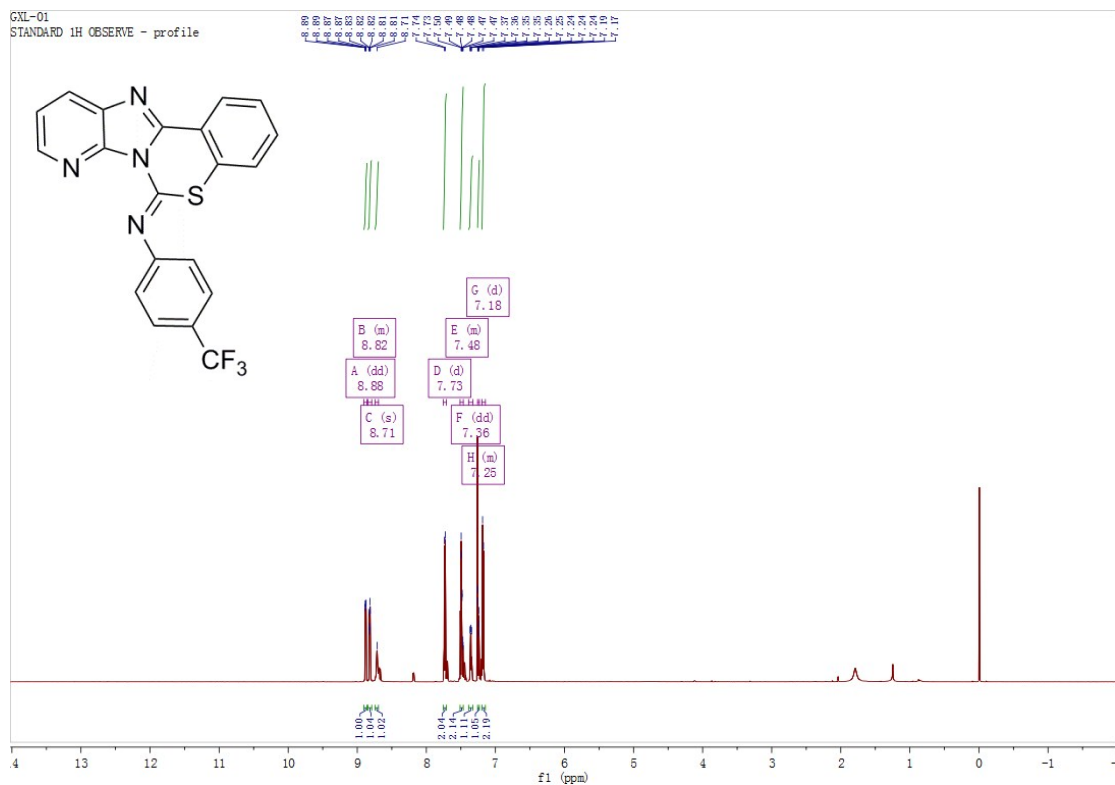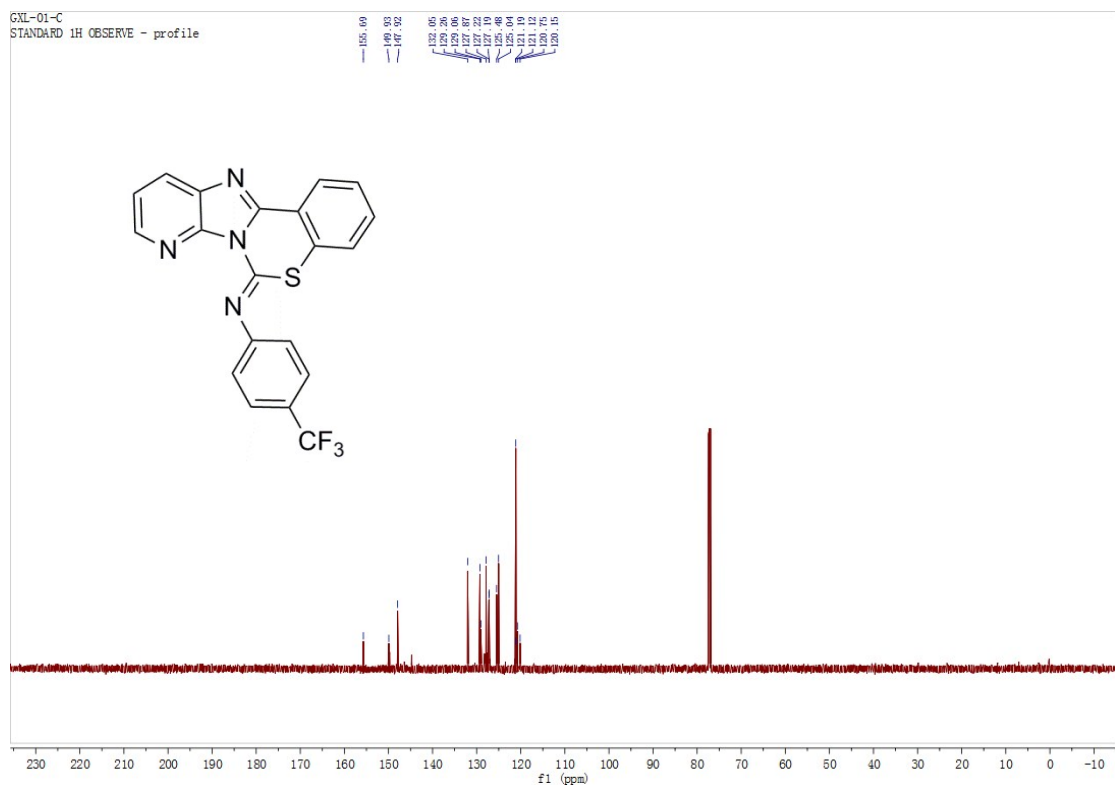

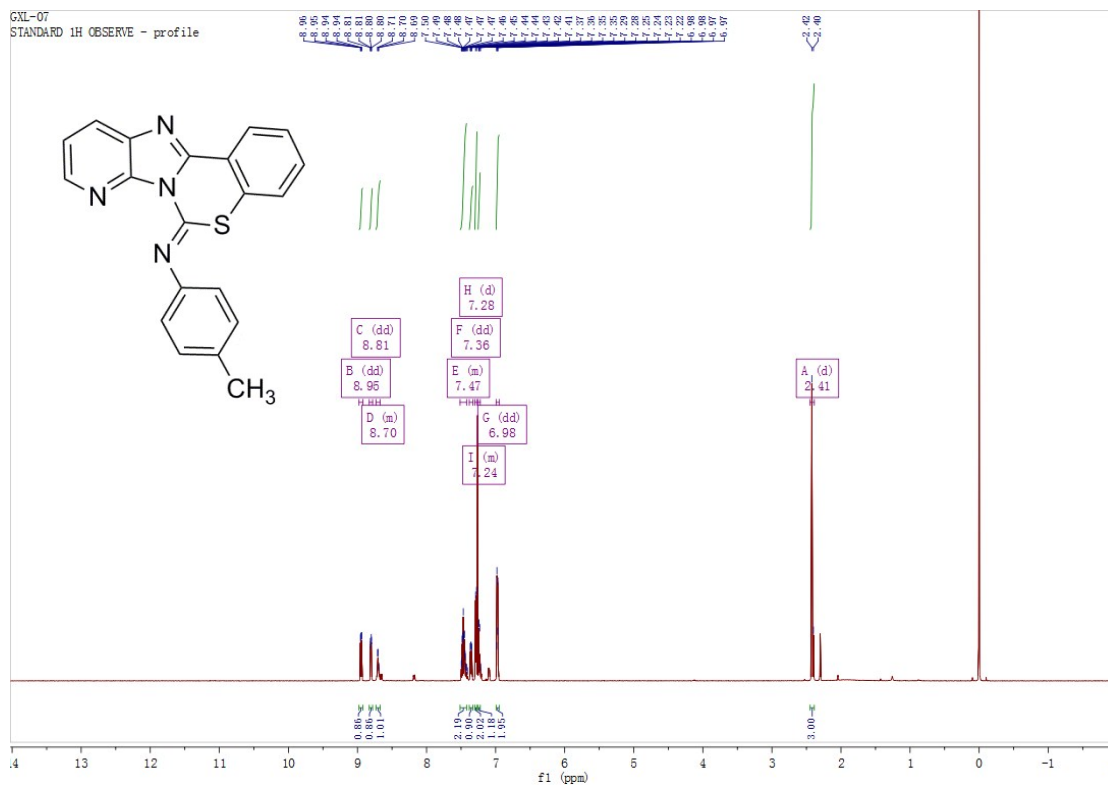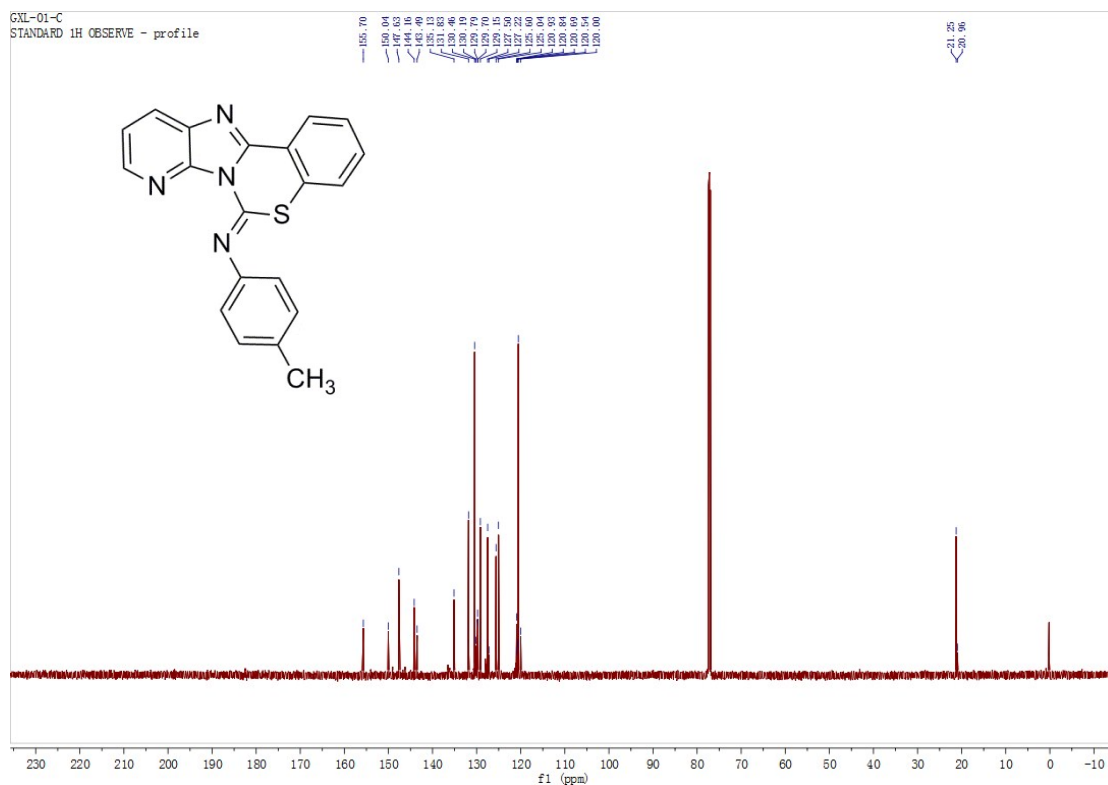

Supplement: c8ra02552e1.pdf [file c8ra02552e1.pdf]
